# Supplementary material for: Computational screening on azafullerene-supported bifunctional single-atom catalysts for oxygen evolution and reduction reactions
Source: Royal Society of Chemistry journal article supplement (doi:10.1039/d4cp03608e), 2024-01-01
Supplement: d4cp03608e1.pdf [file d4cp03608e1.pdf]

*Electronic Supplementary Information (ESI) of*

# Computational screening of efficient azafullerene-supported single atom as bifunctional electrocatalysts for oxygen evolution and reduction reaction

Mo Xiong\*, Tao Yang\*

<sup>1</sup>MOE Key Laboratory for Non-Equilibrium Synthesis and Modulation of Condensed Matter, School of Physics, Xi'an Jiaotong University, Xi'an 710049, Shaanxi, China

Mo Xiong: [xiongmo@xjtu.edu.cn](mailto:xiongmo@xjtu.edu.cn)

Tao Yang: [taoyang1@xjtu.edu.cn](mailto:taoyang1@xjtu.edu.cn)

|                                                                                                                                                                                                                         |    |
|-------------------------------------------------------------------------------------------------------------------------------------------------------------------------------------------------------------------------|----|
| <b>Table S1.</b> Binding, cohesive energies of single TM, and their differences on C <sub>54</sub> N <sub>4</sub> -pyrid. ....                                                                                          | S4 |
| <b>Table S2.</b> Binding, cohesive energies of single TM, and their differences on C <sub>54</sub> N <sub>4</sub> -pyrid-pyrro. ....                                                                                    | S5 |
| <b>Table S3.</b> Binding, cohesive energies of single TM, and their differences on C <sub>64</sub> N <sub>4</sub> -pyrid. ....                                                                                          | S6 |
| <b>Table S4.</b> Binding, cohesive energies of single TM, and their differences on C <sub>64</sub> N <sub>4</sub> -pyrid-pyrro. ....                                                                                    | S7 |
| <b>Table S5.</b> The adsorption Gibbs free energies (eV) and the bond length (Å) of reaction intermediates of OH, O and OOH, overpotentials (V) of OER and ORR on TM@C <sub>54</sub> N <sub>4</sub> -pyrid. ....        | S8 |
| <b>Table S6.</b> The adsorption Gibbs free energies (eV) and the bond length (Å) of reaction intermediates of OH, O and OOH, overpotentials (V) of OER and ORR on TM@C <sub>54</sub> N <sub>4</sub> -pyrid-pyrro.. .... | S9 |
| <b>Table S7.</b> The adsorption Gibbs free energies (eV) and the bond length (Å) of                                                                                                                                     |    |

|                                                                                                                                                                                                                                                                                                                                                                                                                                                       |     |
|-------------------------------------------------------------------------------------------------------------------------------------------------------------------------------------------------------------------------------------------------------------------------------------------------------------------------------------------------------------------------------------------------------------------------------------------------------|-----|
| reaction intermediates of OH, O and OOH, overpotentials (V) of OER and ORR on TM@C <sub>64</sub> N <sub>4</sub> -pyrid. ....                                                                                                                                                                                                                                                                                                                          | S10 |
| <b>Table S8.</b> The adsorption Gibbs free energies (eV) and the bond length (Å) of reaction intermediates of OH, O and OOH, overpotentials (V) of OER and ORR on TM@C <sub>64</sub> N <sub>4</sub> -pyrid-pyrro. ....                                                                                                                                                                                                                                | S11 |
| <b>Table S9.</b> NBO, AIM, Bader charges $Q( e )$ of TM@C <sub>54</sub> N <sub>4</sub> -pyrid, TM@C <sub>54</sub> N <sub>4</sub> -pyrro, TM@C <sub>64</sub> N <sub>4</sub> -pyrid, and TM@C <sub>64</sub> N <sub>4</sub> -pyrro. (TM = Co, Rh, Ir).....                                                                                                                                                                                               | S12 |
| <b>Table S10.</b> Calculated electron density $\rho(rc)$ $\rho$ and its Laplacian $\nabla^2\rho(rc)$ at the bond critical point, bond length, and Wiberg bond orders $P(\text{TM-N})$ of TM-N in TM@C <sub>54</sub> N <sub>4</sub> -pyrid, TM@C <sub>54</sub> N <sub>4</sub> -pyrro, TM@C <sub>64</sub> N <sub>4</sub> -pyrid, and TM@C <sub>64</sub> N <sub>4</sub> -pyrro. (TM = Co, Rh, Ir) .....                                                  | S12 |
| <br>                                                                                                                                                                                                                                                                                                                                                                                                                                                  |     |
| <b>Fig. S1</b> Construction of the structures and relative energies for C <sub>54</sub> N <sub>4</sub> computed in the PBE level of theory. ....                                                                                                                                                                                                                                                                                                      | S15 |
| <b>Fig. S2</b> Construction of the structures and relative energies for C <sub>64</sub> N <sub>4</sub> computed in the PBE level of theory. ....                                                                                                                                                                                                                                                                                                      | S15 |
| <b>Fig. S3</b> Top view and side view of (a) C <sub>54</sub> N <sub>4</sub> -pyrid with four pyridinic nitrogen, (b) C <sub>54</sub> N <sub>4</sub> -pyrid-pyrro with two pyridinic nitrogen and two pyrrolic nitrogen, (c) C <sub>64</sub> N <sub>4</sub> -pyrid with four pyridinic nitrogen, (d) C <sub>64</sub> N <sub>4</sub> -pyrid-pyrro with two pyridinic nitrogen and two pyrrolic nitrogen. ....                                           | S16 |
| <b>Fig. S4</b> The difference between the binding energies of the TM atoms supported on the four azafullerenes C <sub>54</sub> N <sub>4</sub> -pyrid (light red bars), C <sub>54</sub> N <sub>4</sub> -pyrid-pyrro (orange bars), C <sub>64</sub> N <sub>4</sub> -pyrid (light blue bars with diagonal stripes) and C <sub>64</sub> N <sub>4</sub> -pyrid-pyrro (dark blue bars with diagonal stripes), and the corresponding cohesive energies. .... | S16 |
| <b>Fig. S5</b> Summary of the ORR overpotential for TM supported on the four azafullerenes C <sub>54</sub> N <sub>4</sub> -pyrid (light red bars), C <sub>54</sub> N <sub>4</sub> -pyrid-pyrro (orange bars), C <sub>64</sub> N <sub>4</sub> -pyrid (light blue bars with diagonal stripes) and C <sub>64</sub> N <sub>4</sub> -pyrid-pyrro (dark blue bars with diagonal stripes). ....                                                              | S17 |
| <b>Fig. S6</b> Summary of the OER overpotential for TM supported on the four azafullerenes C <sub>54</sub> N <sub>4</sub> -pyrid (light red bars), C <sub>54</sub> N <sub>4</sub> -pyrid-pyrro (orange bars), C <sub>64</sub> N <sub>4</sub> -pyrid (light blue bars with diagonal stripes) and C <sub>64</sub> N <sub>4</sub> -pyrid-pyrro (dark blue bars with diagonal stripes). ....                                                              | S17 |

- Fig. S7** Scaling relationship between  $\Delta G^*_{\text{O}}$  and  $\Delta G^*_{\text{OH}}$  for (a)  $\text{TM}@C_{54}\text{N}_4\text{-pyrid}$ , (c)  $\text{TM}@C_{54}\text{N}_4\text{-pyrid-pyrro}$ , (e)  $\text{TM}@C_{64}\text{N}_4\text{-pyrid}$  and (g)  $\text{TM}@C_{64}\text{N}_4\text{-pyrid-pyrro}$ . And the scaling relationship between  $\Delta G^*_{\text{OOH}}$  and  $\Delta G^*_{\text{OH}}$  for (b)  $\text{TM}@C_{54}\text{N}_4\text{-pyrid}$ , (d)  $\text{TM}@C_{54}\text{N}_4\text{-pyrid-pyrro}$ , (f)  $\text{TM}@C_{64}\text{N}_4\text{-pyrid}$  and (h)  $\text{TM}@C_{64}\text{N}_4\text{-pyrid-pyrro}$ . .....S18
- Fig. S8** Adsorption free energies on (a)  $\text{Co}@C_{54}\text{N}_4\text{-pyrid}$ , (b)  $\text{Rh}@C_{54}\text{N}_4\text{-pyrid}$ , and (c)  $\text{Cu}@C_{54}\text{N}_4\text{-pyrid}$  at electrode potentials of 0 and 1.23 V for ORR and on (d)  $\text{Rh}@C_{54}\text{N}_4\text{-pyrid}$  and (e)  $\text{Ni}@C_{54}\text{N}_4\text{-pyrid}$  at 0 and 1.23 V for OER. ....S19
- Fig. S9** Adsorption free energies on (a)  $\text{Rh}@C_{54}\text{N}_4\text{-pyrid-pyrro}$ , (b)  $\text{Co}@C_{54}\text{N}_4\text{-pyrid-pyrro}$ , and (c)  $\text{Ir}@C_{54}\text{N}_4\text{-pyrid-pyrro}$  at electrode potentials of 0 and 1.23 V for ORR and on (d)  $\text{Rh}@C_{54}\text{N}_4\text{-pyrid-pyrro}$  at 0 and 1.23 V for OER. ....S19
- Fig. S10** Adsorption free energies on (a)  $\text{Rh}@C_{64}\text{N}_4\text{-pyrid}$ , (b)  $\text{Cu}@C_{64}\text{N}_4\text{-pyrid}$ , and (c)  $\text{Co}@C_{64}\text{N}_4\text{-pyrid}$  at electrode potentials of 0 and 1.23 V for ORR and on (d)  $\text{Ni}@C_{64}\text{N}_4\text{-pyrid}$  and (e)  $\text{Rh}@C_{64}\text{N}_4\text{-pyrid}$  at 0 and 1.23 V for OER. ....S20
- Fig. S11** Adsorption free energies on (a)  $\text{Rh}@C_{64}\text{N}_4\text{-pyrid-pyrro}$  and (b)  $\text{Co}@C_{64}\text{N}_4\text{-pyrid-pyrro}$  at electrode potentials of 0 and 1.23 V for ORR and on (c)  $\text{Rh}@C_{64}\text{N}_4\text{-pyrid-pyrro}$  at 0 and 1.23 V for OER. ....S20
- Fig. S12** *d*-band center energies of the TM atoms on  $C_{54}\text{N}_4\text{-pyrid}$ ,  $C_{54}\text{N}_4\text{-pyrid-pyrro}$ ,  $C_{64}\text{N}_4\text{-pyrid}$  and  $C_{54}\text{N}_4\text{-pyrid-pyrro}$ . ....S21
- Fig. S13** Crystal orbital Hamilton population (COHP) between the active centers TM and the  $\text{OH}^*$  intermediate for  $\text{TM}@C_{54}\text{N}_4\text{-pyrid}$ ,  $\text{TM}@C_{54}\text{N}_4\text{-pyrid-pyrro}$ ,  $\text{TM}@C_{64}\text{N}_4\text{-pyrid}$   $\text{TM}@C_{64}\text{N}_4\text{-pyrid-pyrro}$  with the bonding state (green) and antibonding (red) state. (TM = Co, Rh, and Ir). ....S22
- Fig. S14** Evolution of the temperature and the total energy within 10 ps AIMD simulations at 300 K for  $\text{TM}@C_{54}\text{N}_4\text{-pyrid}$ ,  $\text{TM}@C_{54}\text{N}_4\text{-pyrid-pyrro}$ ,  $\text{TM}@C_{64}\text{N}_4\text{-pyrid}$ , and  $\text{TM}@C_{64}\text{N}_4\text{-pyrid-pyrro}$  (TM = Co, Rh, Ir) complexes. ....S23
- Fig. S15** Adsorption free energies on  $\text{PtN}_4@\text{graphene}$ . ....S24
- Fig. S16** A comparison of adsorption free energies on  $\text{Rh}@C_{64}\text{N}_4\text{-pyrid}$  from the vacuum and implicit solvent ( $\text{H}_2\text{O}$ ) model.....S24

**Table S1.** Binding, cohesive energies of single TM, and their differences on C<sub>54</sub>N<sub>4</sub>-pyrid.

| TM | $E_b$ (eV) | $E_{coh}$ (eV) | $E_b - E_{coh}$ (eV) |
|----|------------|----------------|----------------------|
| Fe | -6.485     | -4.28          | -2.205               |
| Co | -6.815     | -4.39          | -2.425               |
| Ni | -6.49      | -4.44          | -2.05                |
| Ru | -7.49      | -6.74          | -0.75                |
| Rh | -6.712     | -5.75          | -0.962               |
| Pd | -4.283     | -3.89          | -0.393               |
| Os | -7.957     | -8.17          | 0.213                |
| Ir | -7.646     | -6.94          | -0.706               |
| Pt | -6.024     | -5.84          | -0.184               |
| Ti | -7.526     | -4.85          | -2.676               |
| V  | -6.201     | -5.31          | -0.891               |
| Cr | -5.959     | -4.1           | -1.859               |
| Mn | -5.412     | -2.92          | -2.492               |
| Cu | -4.144     | -3.49          | -0.654               |
| Zn | -2.77      | -1.35          | -1.42                |
| Au | -1.884     | -3.81          | 1.926                |
| Zr | -8.207     | -6.25          | -1.957               |
| Nb | -7.306     | -7.57          | 0.264                |
| Mo | -4.954     | -6.82          | 1.866                |
| Hf | -8.195     | -6.44          | -1.755               |
| Ta | -8.102     | -8.1           | -0.002               |
| W  | -6.416     | -8.9           | 2.484                |
| Sc | -6.906     | -3.9           | -3.006               |
| Y  | -6.714     | -4.37          | -2.344               |
| Cd | -1.523     | -1.16          | -0.363               |
| Ag | -2.588     | -2.95          | 0.362                |
| Re | -4.853     | -8.03          | 3.177                |

**Table S2.** Binding, cohesive energies of single TM, and their differences on C<sub>54</sub>N<sub>4</sub>-pyrid-pyrro.

| M | $E_b$ (eV) | $E_{coh}$ (eV) | $E_b - E_{coh}$ (eV) |
|---|------------|----------------|----------------------|
|---|------------|----------------|----------------------|

|    |        |       |        |
|----|--------|-------|--------|
| Fe | -7.319 | -4.28 | -3.039 |
| Co | -7.541 | -4.39 | -3.151 |
| Ni | -7.485 | -4.44 | -3.045 |
| Ru | -7.818 | -6.74 | -1.078 |
| Rh | -7.371 | -5.75 | -1.621 |
| Pd | -5.435 | -3.89 | -1.545 |
| Os | -8.312 | -8.17 | -0.142 |
| Ir | -8.354 | -6.94 | -1.414 |
| Pt | -7.257 | -5.84 | -1.417 |
| Ti | -9.191 | -4.85 | -4.341 |
| V  | -8.432 | -5.31 | -3.122 |
| Cr | -7.014 | -4.1  | -2.914 |
| Mn | -6.489 | -2.92 | -3.569 |
| Cu | -5.244 | -3.49 | -1.754 |
| Zn | -3.961 | -1.35 | -2.611 |
| Au | -3.38  | -3.81 | 0.43   |
| Zr | -8.752 | -6.25 | -2.502 |
| Nb | -7.553 | -7.57 | 0.017  |
| Mo | -7.22  | -6.82 | -0.4   |
| Hf | -8.727 | -6.44 | -2.287 |
| Ta | -9.678 | -8.1  | -1.578 |
| W  | -8.538 | -8.9  | 0.362  |
| Sc | -9.341 | -3.9  | -5.441 |
| Y  | -7.868 | -4.37 | -3.498 |
| Cd | -2.674 | -1.16 | -1.514 |
| Ag | -3.044 | -2.95 | -0.094 |
| Re | -7.449 | -8.03 | 0.581  |

**Table S3.** Binding, cohesive energies of single TM, and their differences on C<sub>64</sub>N<sub>4</sub>-pyrid.

| M  | $E_b$ (eV) | $E_{coh}$ (eV) | $E_b - E_{coh}$ (eV) |
|----|------------|----------------|----------------------|
| Fe | -6.394     | -4.28          | -2.114               |

|    |        |       |        |
|----|--------|-------|--------|
| Co | -6.68  | -4.39 | -2.29  |
| Ni | -6.366 | -4.44 | -1.926 |
| Ru | -7.342 | -6.74 | -0.602 |
| Rh | -6.555 | -5.75 | -0.805 |
| Pd | -4.129 | -3.89 | -0.239 |
| Os | -7.773 | -8.17 | 0.397  |
| Ir | -7.477 | -6.94 | -0.537 |
| Pt | -5.855 | -5.84 | -0.015 |
| Ti | -7.66  | -4.85 | -2.81  |
| V  | -6.088 | -5.31 | -0.778 |
| Cr | -5.876 | -4.1  | -1.776 |
| Mn | -5.366 | -2.92 | -2.446 |
| Cu | -4.041 | -3.49 | -0.551 |
| Zn | -2.635 | -1.35 | -1.285 |
| Au | -1.76  | -3.81 | 2.05   |
| Zr | -8.259 | -6.25 | -2.009 |
| Nb | -7.236 | -7.57 | 0.334  |
| Mo | -4.817 | -6.82 | 2.003  |
| Hf | -8.265 | -6.44 | -1.825 |
| Ta | -8.038 | -8.1  | 0.062  |
| W  | -6.18  | -8.9  | 2.72   |
| Sc | -6.825 | -3.9  | -2.925 |
| Y  | -6.511 | -4.37 | -2.141 |
| Cd | -1.404 | -1.16 | -0.244 |
| Ag | -2.526 | -2.95 | 0.424  |
| Re | -4.581 | -8.03 | 3.449  |

**Table S4.** Binding, cohesive energies of single TM, and their differences on C<sub>64</sub>N<sub>4</sub>-pyrid-pyrro.

| M  | $E_b$ (eV) | $E_{coh}$ (eV) | $E_b - E_{coh}$ (eV) |
|----|------------|----------------|----------------------|
| Fe | -8.325     | -4.28          | -4.045               |

|    |         |       |        |
|----|---------|-------|--------|
| Co | -8.499  | -4.39 | -4.109 |
| Ni | -8.461  | -4.44 | -4.021 |
| Ru | -8.833  | -6.74 | -2.093 |
| Rh | -8.343  | -5.75 | -2.593 |
| Pd | -6.599  | -3.89 | -2.709 |
| Os | -9.542  | -8.17 | -1.372 |
| Ir | -9.602  | -6.94 | -2.662 |
| Pt | -8.584  | -5.84 | -2.744 |
| Ti | -10.038 | -4.85 | -5.188 |
| V  | -9.259  | -5.31 | -3.949 |
| Cr | -7.82   | -4.1  | -3.72  |
| Mn | -7.573  | -2.92 | -4.653 |
| Cu | -6.019  | -3.49 | -2.529 |
| Zn | -4.563  | -1.35 | -3.213 |
| Au | -4.513  | -3.81 | -0.703 |
| Zr | -9.728  | -6.25 | -3.478 |
| Nb | -9.937  | -7.57 | -2.367 |
| Mo | -8.208  | -6.82 | -1.388 |
| Hf | -9.663  | -6.44 | -3.223 |
| Ta | -10.784 | -8.1  | -2.684 |
| W  | -9.731  | -8.9  | -0.831 |
| Sc | -10.204 | -3.9  | -6.304 |
| Y  | -8.868  | -4.37 | -4.498 |
| Cd | -3.142  | -1.16 | -1.982 |
| Ag | -2.18   | -2.95 | 0.77   |
| Re | -7.147  | -8.03 | 0.883  |

**Table S5.** The adsorption Gibbs free energies (eV) and the bond length (Å) of reaction intermediates of OH, O and OOH, overpotentials (V) of OER and ORR on TM@C<sub>54</sub>N<sub>4</sub>-pyrid.

| TM | $\Delta G_{*OH}$ | $\Delta G_{*O}$ | $\Delta G_{*OOH}$ | $\eta_{OER}$ | $\eta_{ORR}$ | M-O | M-OH | M-OOH |
|----|------------------|-----------------|-------------------|--------------|--------------|-----|------|-------|
|----|------------------|-----------------|-------------------|--------------|--------------|-----|------|-------|

|    |        |        |        |       |       |       |       |       |
|----|--------|--------|--------|-------|-------|-------|-------|-------|
| Fe | 0.173  | 1.222  | 3.311  | 0.859 | 1.057 | 1.638 | 1.829 | 1.755 |
| Co | 0.957  | 2.101  | 3.914  | 0.583 | 0.273 | 1.654 | 1.865 | 1.855 |
| Ni | 1.383  | 2.973  | 4.352  | 0.36  | 0.662 | 1.718 | 1.846 | 1.861 |
| Ru | 0.257  | 0.683  | 3.122  | 1.209 | 0.973 | 1.726 | 1.926 | 1.839 |
| Rh | 1.121  | 2.635  | 4.05   | 0.283 | 0.36  | 1.823 | 2.012 | 2.033 |
| Pd | 1.652  | 3.345  | 4.921  | 0.463 | 1.231 | 1.791 | 1.931 | 2.299 |
| Os | -0.161 | -0.296 | 0.786  | 2.904 | 1.391 | 1.741 | 1.94  | 1.778 |
| Ir | 0.771  | 1.805  | 3.77   | 0.736 | 0.459 | 1.819 | 2.015 | 1.985 |
| Pt | 2.964  | 3.283  | 4.995  | 1.734 | 1.305 | 1.784 | 1.877 | 2.322 |
| Ti | -2.599 | -2.564 | 0.72   | 2.97  | 3.829 | 1.632 | 1.804 | 1.886 |
| V  | -2.741 | -2.938 | -1.647 | 5.337 | 3.971 | 1.596 | 1.779 | 1.611 |
| Cr | -0.39  | -0.4   | 2.791  | 1.961 | 1.62  | 1.568 | 1.809 | 1.806 |
| Mn | -0.131 | 0.149  | 3.126  | 1.747 | 1.361 | 1.574 | 1.834 | 1.846 |
| Cu | 1.063  | 2.987  | 4.062  | 0.695 | 0.372 | 1.743 | 1.83  | 1.855 |
| Zn | 0.101  | 2.682  | 3.461  | 1.351 | 1.129 | 1.853 | 1.849 | 1.911 |
| Au | 0.357  | 6.75   | 4.817  | 5.163 | 3.163 | 2.158 | 1.95  | 2.818 |
| Zr | -3.136 | -2.682 | 0.318  | 3.372 | 4.366 | 1.771 | 1.934 | 2.046 |
| Nb | -2.722 | -2.971 | -3.428 | 7.118 | 3.952 | 1.717 | 1.894 | 1.721 |
| Mo | -3.053 | -3.507 | -0.688 | 4.378 | 4.283 | 1.682 | 1.877 | 1.674 |
| Hf | -3.558 | -2.834 | -0.16  | 3.85  | 4.788 | 1.78  | 1.912 | 2.024 |
| Ta | -3.147 | -3.302 | -3.916 | 7.606 | 4.377 | 1.746 | 1.895 | 1.75  |
| W  | -3.363 | -3.765 | -4.114 | 7.804 | 4.593 | 1.719 | 1.881 | 1.734 |
| Sc | -3.1   | -1.166 | 0.299  | 3.391 | 4.33  | 1.735 | 1.868 | 1.983 |
| Y  | -3.376 | -1.138 | -0.017 | 3.707 | 4.606 | 1.876 | 2.021 | 2.14  |
| Cd | -0.051 | 2.638  | 3.331  | 1.459 | 1.281 | 2.052 | 2.055 | 2.113 |
| Ag | 1.448  | 3.516  | 4.306  | 0.837 | 0.616 | 1.974 | 2.058 | 2.128 |
| Re | -3.727 | -4.134 | -3.182 | 6.872 | 4.957 | 1.712 | 1.894 | 1.745 |

**Table S6.** The adsorption Gibbs free energies (eV) and the bond length (Å) of reaction intermediates of OH, O and OOH, overpotentials (V) of OER and ORR on TM@C<sub>54</sub>N<sub>4</sub>-pyrid-pyrro..

| TM | $\Delta G^*_{OH}$ | $\Delta G^*_O$ | $\Delta G^*_{OOH}$ | $\eta_{OER}$ | $\eta_{ORR}$ | M-O | M-OH | M-OOH |
|----|-------------------|----------------|--------------------|--------------|--------------|-----|------|-------|
|----|-------------------|----------------|--------------------|--------------|--------------|-----|------|-------|



|    |        |        |        |       |       |       |       |       |
|----|--------|--------|--------|-------|-------|-------|-------|-------|
| Fe | 0.271  | 1.268  | 3.409  | 0.912 | 0.959 | 1.624 | 1.832 | 1.742 |
| Co | 1.028  | 2.248  | 4.069  | 0.591 | 0.379 | 1.646 | 1.85  | 1.825 |
| Ni | 1.71   | 3.273  | 4.802  | 0.48  | 1.112 | 1.698 | 1.832 | 1.987 |
| Ru | 0.05   | 0.456  | 2.783  | 1.098 | 1.18  | 1.711 | 1.903 | 1.779 |
| Rh | 1.078  | 2.598  | 3.952  | 0.29  | 0.262 | 1.779 | 1.973 | 1.993 |
| Pd | 2.31   | 4.478  | 4.979  | 1.08  | 1.289 | 2.021 | 1.928 | 2.363 |
| Os | -0.285 | -0.182 | 2.32   | 1.37  | 1.515 | 1.733 | 1.922 | 1.768 |
| Ir | 0.816  | 2.016  | 3.769  | 0.524 | 0.414 | 1.806 | 1.991 | 1.968 |
| Pt | 2.29   | 3.982  | 5.062  | 1.06  | 1.372 | 1.782 | 2.068 | 2.391 |
| Ti | -2.07  | -2.018 | 1.287  | 2.403 | 3.3   | 1.634 | 1.799 | 1.887 |
| V  | -1.328 | -1.725 | -0.778 | 4.468 | 2.558 | 1.596 | 1.78  | 1.603 |
| Cr | -0.157 | -0.215 | 3.006  | 1.991 | 1.387 | 1.565 | 1.801 | 1.837 |
| Mn | 0.005  | 0.555  | 3.146  | 1.361 | 1.225 | 1.571 | 1.814 | 1.864 |
| Cu | 1.725  | 3.638  | 4.658  | 0.684 | 0.968 | 1.738 | 1.833 | 1.868 |
| Zn | 0.87   | 3.491  | 4.034  | 1.391 | 0.687 | 1.864 | 1.862 | 1.945 |
| Au | 1.648  | 3.43   | 4.884  | 0.552 | 1.194 | 1.861 | 1.966 | 2.896 |
| Zr | -3.701 | -3.297 | -0.334 | 4.024 | 4.931 | 1.772 | 1.931 | 2.044 |
| Nb | -3.429 | -3.768 | -4.269 | 7.959 | 4.659 | 1.717 | 1.887 | 1.721 |
| Mo | -1.45  | -2.182 | -1.328 | 5.018 | 2.68  | 1.682 | 1.858 | 1.692 |
| Hf | -4.143 | -3.446 | -2.491 | 6.181 | 5.373 | 1.781 | 1.908 | 1.825 |
| Ta | -2.597 | -2.791 | -3.413 | 7.103 | 3.827 | 1.744 | 1.886 | 1.749 |
| W  | -1.871 | -2.644 | -2.408 | 6.098 | 3.101 | 1.718 | 1.869 | 1.73  |
| Sc | -1.874 | 0.631  | 1.439  | 2.251 | 3.104 | 1.754 | 1.87  | 1.987 |
| Y  | -3.497 | -0.786 | -0.192 | 3.882 | 4.727 | 1.905 | 2.024 | 2.149 |
| Cd | 0.642  | 3.304  | 3.9    | 1.432 | 0.634 | 2.074 | 2.064 | 2.14  |
| Ag | 1.569  | 3.912  | 4.383  | 1.113 | 0.759 | 1.92  | 2.01  | 2.072 |
| Re | -1.29  | -2.215 | -0.866 | 4.556 | 2.52  | 1.704 | 1.886 | 1.727 |

**Table S7.** The adsorption Gibbs free energies (eV) and the bond length (Å) of reaction intermediates of OH, O and OOH, overpotentials (V) of OER and ORR on TM@C<sub>64</sub>N<sub>4</sub>-pyrid.

| TM | $\Delta G^*_{OH}$ | $\Delta G^*_O$ | $\Delta G^*_{OOH}$ | $\eta_{OER}$ | $\eta_{ORR}$ | M-O | M-OH | M-OOH |
|----|-------------------|----------------|--------------------|--------------|--------------|-----|------|-------|
|----|-------------------|----------------|--------------------|--------------|--------------|-----|------|-------|

|    |        |        |        |       |       |       |       |       |
|----|--------|--------|--------|-------|-------|-------|-------|-------|
| Fe | 0.07   | 1.194  | 3.302  | 0.878 | 1.16  | 1.638 | 1.824 | 1.834 |
| Co | 0.813  | 2.024  | 3.797  | 0.543 | 0.417 | 1.653 | 1.863 | 1.851 |
| Ni | 1.32   | 2.86   | 4.357  | 0.309 | 0.667 | 1.718 | 1.848 | 1.857 |
| Ru | 0.22   | 0.463  | 3.204  | 1.511 | 1.01  | 1.725 | 1.938 | 1.924 |
| Rh | 1.027  | 2.419  | 4.013  | 0.364 | 0.323 | 1.82  | 2.022 | 2.032 |
| Pd | 1.543  | 3.196  | 4.913  | 0.487 | 1.223 | 1.789 | 1.926 | 2.311 |
| Os | -0.273 | -0.521 | 0.542  | 3.148 | 1.503 | 1.742 | 1.941 | 1.778 |
| Ir | 0.618  | 1.629  | 3.657  | 0.798 | 0.612 | 1.819 | 2.015 | 1.989 |
| Pt | 1.735  | 2.836  | 4.72   | 0.654 | 1.03  | 1.768 | 2.083 | 2.159 |
| Ti | -2.384 | -2.323 | -1.773 | 5.463 | 3.614 | 1.633 | 1.804 | 1.648 |
| V  | -2.816 | -2.565 | -2.173 | 5.863 | 4.046 | 1.594 | 1.779 | 1.609 |
| Cr | -0.424 | -0.383 | 2.753  | 1.906 | 1.654 | 1.571 | 1.793 | 1.858 |
| Mn | -0.161 | 0.151  | 3.121  | 1.74  | 1.391 | 1.577 | 1.839 | 1.851 |
| Cu | 0.98   | 2.909  | 4.093  | 0.699 | 0.403 | 1.741 | 1.825 | 1.857 |
| Zn | 0.029  | 2.595  | 3.409  | 1.336 | 1.201 | 1.851 | 1.848 | 1.906 |
| Au | 0.261  | 2.244  | 4.803  | 1.329 | 1.113 | 1.868 | 1.95  | 2.839 |
| Zr | -2.984 | -2.529 | 0.333  | 3.357 | 4.214 | 1.771 | 1.938 | 2.051 |
| Nb | -2.741 | -2.919 | -3.41  | 7.1   | 3.971 | 1.718 | 1.895 | 1.722 |
| Mo | -3.212 | -3.518 | -3.447 | 7.137 | 4.442 | 1.683 | 1.881 | 1.707 |
| Hf | -3.389 | -2.657 | -0.007 | 3.697 | 4.619 | 1.78  | 1.915 | 2.028 |
| Ta | -3.175 | -3.257 | -3.918 | 7.608 | 4.405 | 1.747 | 1.893 | 1.752 |
| W  | -3.764 | -3.886 | -4.471 | 8.161 | 4.994 | 1.721 | 1.883 | 1.736 |
| Sc | -3.066 | -1.188 | 0.254  | 3.436 | 4.296 | 1.734 | 1.869 | 1.981 |
| Y  | -3.464 | -1.299 | -0.163 | 3.853 | 4.694 | 1.873 | 2.021 | 2.141 |
| Cd | -0.104 | 2.462  | 3.277  | 1.336 | 1.334 | 2.06  | 2.055 | 2.111 |
| Ag | 1.391  | 3.506  | 4.368  | 0.885 | 0.678 | 1.963 | 2.048 | 2.118 |
| Re | -4.056 | -4.321 | -3.474 | 7.164 | 5.286 | 1.715 | 1.893 | 1.748 |

**Table S8.** The adsorption Gibbs free energies (eV) and the bond length (Å) of reaction intermediates of OH, O and OOH, overpotentials (V) of OER and ORR on TM@C<sub>64</sub>N<sub>4</sub>-pyrid-pyrro.

| TM | $\Delta G^*_{OH}$ | $\Delta G^*_O$ | $\Delta G^*_{OOH}$ | $\eta_{OER}$ | $\eta_{ORR}$ | M-O | M-OH | M-OOH |
|----|-------------------|----------------|--------------------|--------------|--------------|-----|------|-------|
|----|-------------------|----------------|--------------------|--------------|--------------|-----|------|-------|

|    |        |        |        |       |       |       |       |       |
|----|--------|--------|--------|-------|-------|-------|-------|-------|
| Fe | 0.158  | 1.171  | 3.565  | 1.165 | 1.072 | 1.623 | 1.831 | 1.787 |
| Co | 0.935  | 2.12   | 3.967  | 0.617 | 0.295 | 1.644 | 1.844 | 1.827 |
| Ni | 1.705  | 3.235  | 4.8    | 0.475 | 1.11  | 1.696 | 1.826 | 1.987 |
| Ru | 0.042  | 0.387  | 2.726  | 1.109 | 1.188 | 1.711 | 1.896 | 1.761 |
| Rh | 0.99   | 2.411  | 3.854  | 0.213 | 0.24  | 1.777 | 1.97  | 1.994 |
| Pd | 2.312  | 4.176  | 5.013  | 1.082 | 1.323 | 1.777 | 1.921 | 2.351 |
| Os | -0.346 | -0.306 | 2.211  | 1.479 | 1.576 | 1.732 | 1.917 | 1.76  |
| Ir | 0.736  | 1.912  | 3.806  | 0.664 | 0.494 | 1.804 | 1.99  | 1.974 |
| Pt | 2.272  | 3.971  | 5.09   | 1.042 | 1.4   | 1.781 | 2.067 | 2.385 |
| Ti | -2.149 | -2.136 | 1.207  | 2.483 | 3.379 | 1.633 | 1.798 | 1.89  |
| V  | -1.43  | -1.886 | -0.899 | 4.589 | 2.66  | 1.597 | 1.774 | 1.604 |
| Cr | -0.19  | -0.266 | 3.005  | 2.04  | 1.42  | 1.565 | 1.797 | 1.839 |
| Mn | 0.023  | 0.604  | 3.151  | 1.317 | 1.207 | 1.569 | 1.81  | 1.862 |
| Cu | 1.786  | 3.696  | 4.719  | 0.68  | 1.029 | 1.737 | 1.807 | 1.878 |
| Zn | 0.943  | 3.552  | 4.048  | 1.379 | 0.734 | 1.867 | 1.864 | 1.949 |
| Au | 1.566  | 3.482  | 4.865  | 0.686 | 1.175 | 1.863 | 1.966 | 2.924 |
| Zr | -3.671 | -3.304 | -2.229 | 5.919 | 4.901 | 1.772 | 1.928 | 1.801 |
| Nb | -2.307 | -2.549 | -2.864 | 6.554 | 3.537 | 1.718 | 1.883 | 1.718 |
| Mo | -1.503 | -2.267 | -1.621 | 5.311 | 2.733 | 1.682 | 1.857 | 1.697 |
| Hf | -4.126 | -3.437 | -2.398 | 6.088 | 5.356 | 1.781 | 1.908 | 1.836 |
| Ta | -2.681 | -2.869 | -3.434 | 7.124 | 3.911 | 1.745 | 1.885 | 1.751 |
| W  | -1.966 | -2.789 | -2.589 | 6.279 | 3.196 | 1.718 | 1.867 | 1.729 |
| Sc | -1.928 | 0.641  | 1.391  | 2.299 | 3.158 | 1.756 | 1.87  | 1.987 |
| Y  | -1.802 | 1.01   | 1.512  | 2.178 | 3.032 | 1.906 | 2.024 | 2.15  |
| Cd | 0.714  | 3.265  | 3.917  | 1.321 | 0.578 | 2.081 | 2.067 | 2.155 |
| Ag | 1.563  | 3.915  | 4.376  | 1.122 | 0.769 | 1.918 | 2.007 | 2.07  |
| Re | -1.263 | -2.373 | -1.161 | 4.851 | 2.493 | 1.704 | 1.887 | 1.73  |

**Table S9.** NBO, AIM, Bader charges  $Q(|e|)$  of TM@C<sub>54</sub>N<sub>4</sub>-pyrid, TM@C<sub>54</sub>N<sub>4</sub>-pyrro, TM@C<sub>64</sub>N<sub>4</sub>-pyrid, and TM@C<sub>64</sub>N<sub>4</sub>-pyrro. (TM = Co, Rh, Ir)

| TM@C <sub>54</sub> N <sub>4</sub> -pyrid | $Q( e )$ |
|------------------------------------------|----------|
|------------------------------------------|----------|

|                                                |         |        |
|------------------------------------------------|---------|--------|
| TM                                             | NBO     | AIM    |
| Co                                             | 0.73961 | 0.8494 |
| Rh                                             | 0.69133 | 0.7456 |
| Ir                                             | 0.79903 | 0.8521 |
| TM@C <sub>54</sub> N <sub>4</sub> -pyrid-pyrro |         |        |
| Co                                             | 0.80358 | 0.9113 |
| Rh                                             | 0.7294  | 0.7968 |
| Ir                                             | 0.79576 | 0.889  |
| TM@C <sub>64</sub> N <sub>4</sub> -pyrid       |         |        |
| Co                                             | 0.75299 | 0.8579 |
| Rh                                             | 0.70908 | 0.7362 |
| Ir                                             | 0.81434 | 0.8786 |
| TM@C <sub>64</sub> N <sub>4</sub> -pyrid-pyrro |         |        |
| Co                                             | 0.81085 | 0.9346 |
| Rh                                             | 0.74021 | 0.8197 |
| Ir                                             | 0.79601 | 0.8988 |

**Table S10.** Calculated electron density  $\rho(r_c)$  and its Laplacian  $\nabla^2\rho(r_c)$  at the bond critical point, bond length, and Wiberg bond orders  $P(\text{TM-N})$  of TM-N in TM@C<sub>54</sub>N<sub>4</sub>-pyrid, TM@C<sub>54</sub>N<sub>4</sub>-pyrro, TM@C<sub>64</sub>N<sub>4</sub>-pyrid, and TM@C<sub>64</sub>N<sub>4</sub>-pyrro. (TM = Co, Rh, Ir)

| TM@C <sub>54</sub> N <sub>4</sub> -pyrid | $\rho(r_c)$ | $\nabla^2\rho(r_c)$ | BL       | BL(PBE) | $P(\text{TM-N})$ |
|------------------------------------------|-------------|---------------------|----------|---------|------------------|
| Co-N1                                    | 0.123221    | 0.488037            | 1.872127 | 1.869   | 0.4446           |
| Co-N2                                    | 0.123221    | 0.488037            | 1.872127 | 1.869   | 0.4446           |
| Co-N3                                    | 0.123221    | 0.488037            | 1.872127 | 1.868   | 0.4446           |
| Co-N4                                    | 0.123221    | 0.488037            | 1.872127 | 1.868   | 0.4446           |
| Rh-N1                                    | 0.128277    | 0.427088            | 1.99     | 1.984   | 0.453            |
| Rh-N2                                    | 0.128277    | 0.427088            | 1.99     | 1.983   | 0.453            |
| Rh-N3                                    | 0.128277    | 0.427088            | 1.99     | 1.984   | 0.453            |
| Rh-N4                                    | 0.128277    | 0.427088            | 1.99     | 1.985   | 0.453            |
| Ir-N1                                    | 0.146511    | 0.436251            | 1.972345 | 1.978   | 0.5617           |
| Ir-N2                                    | 0.146511    | 0.436251            | 1.972345 | 1.977   | 0.5617           |
| Ir-N3                                    | 0.146511    | 0.436251            | 1.972345 | 1.977   | 0.5617           |

|                                                |          |          |          |       |        |
|------------------------------------------------|----------|----------|----------|-------|--------|
| Ir-N4                                          | 0.146511 | 0.436251 | 1.972345 | 1.977 | 0.5617 |
| TM@C <sub>54</sub> N <sub>4</sub> -pyrid-pyrro |          |          |          |       |        |
| Co-N1                                          | 0.124477 | 0.46638  | 1.869603 | 1.884 | 0.4336 |
| Co-N2                                          | 0.122102 | 0.456943 | 1.876957 | 1.883 | 0.457  |
| Co-N3                                          | 0.122102 | 0.456943 | 1.876957 | 1.883 | 0.457  |
| Co-N4                                          | 0.124477 | 0.46638  | 1.869603 | 1.885 | 0.4336 |
| Rh-N1                                          | 0.129295 | 0.408308 | 1.988829 | 1.99  | 0.4514 |
| Rh-N2                                          | 0.12798  | 0.404772 | 1.991095 | 1.994 | 0.4811 |
| Rh-N3                                          | 0.12798  | 0.404772 | 1.991095 | 1.993 | 0.4811 |
| Rh-N4                                          | 0.129295 | 0.408308 | 1.988829 | 1.99  | 0.4514 |
| Ir-N1                                          | 0.143769 | 0.415027 | 1.981557 | 1.985 | 0.5362 |
| Ir-N2                                          | 0.141329 | 0.417274 | 1.985292 | 1.986 | 0.5572 |
| Ir-N3                                          | 0.141329 | 0.417274 | 1.985292 | 1.986 | 0.5572 |
| Ir-N4                                          | 0.143769 | 0.415027 | 1.981557 | 1.986 | 0.5362 |
| TM@C <sub>64</sub> N <sub>4</sub> -pyrid       |          |          |          |       |        |
| Co-N1                                          | 0.126272 | 0.491744 | 1.863617 | 1.86  | 0.4723 |
| Co-N2                                          | 0.119905 | 0.473963 | 1.883336 | 1.873 | 0.429  |
| Co-N3                                          | 0.119905 | 0.473963 | 1.883336 | 1.873 | 0.429  |
| Co-N4                                          | 0.126272 | 0.491744 | 1.863617 | 1.859 | 0.4723 |
| Rh-N1                                          | 0.130014 | 0.430796 | 1.985649 | 1.978 | 0.4719 |
| Rh-N2                                          | 0.126026 | 0.417219 | 1.998573 | 1.991 | 0.4398 |
| Rh-N3                                          | 0.126026 | 0.417219 | 1.998573 | 1.99  | 0.4398 |
| Rh-N4                                          | 0.130014 | 0.430796 | 1.985649 | 1.978 | 0.4719 |
| Ir-N1                                          | 0.147909 | 0.432521 | 1.969918 | 1.972 | 0.5654 |
| Ir-N2                                          | 0.146904 | 0.432688 | 1.972042 | 1.979 | 0.5692 |
| Ir-N3                                          | 0.146904 | 0.432688 | 1.972042 | 1.979 | 0.5692 |
| Ir-N4                                          | 0.147909 | 0.432521 | 1.969918 | 1.971 | 0.5654 |
| TM@C <sub>64</sub> N <sub>4</sub> -pyrid-pyrro |          |          |          |       |        |
| Co-N1                                          | 0.123168 | 0.456362 | 1.874369 | 1.889 | 0.4274 |
| Co-N2                                          | 0.122764 | 0.453141 | 1.875359 | 1.885 | 0.4604 |
| Co-N3                                          | 0.122764 | 0.453141 | 1.875359 | 1.884 | 0.4604 |

|       |          |          |          |       |        |
|-------|----------|----------|----------|-------|--------|
| Co-N4 | 0.123168 | 0.456362 | 1.874369 | 1.888 | 0.4274 |
| Rh-N1 | 0.126389 | 0.405666 | 1.995764 | 1.999 | 0.446  |
| Rh-N2 | 0.126968 | 0.406332 | 1.99166  | 1.994 | 0.4849 |
| Rh-N3 | 0.126969 | 0.406332 | 1.99166  | 1.994 | 0.4849 |
| Rh-N4 | 0.126369 | 0.405666 | 1.995764 | 1.999 | 0.446  |
| Ir-N1 | 0.142552 | 0.408992 | 1.985844 | 1.993 | 0.5319 |
| Ir-N2 | 0.141493 | 0.41444  | 1.985326 | 1.989 | 0.5587 |
| Ir-N3 | 0.141493 | 0.41444  | 1.985326 | 1.989 | 0.5587 |
| Ir-N4 | 0.142552 | 0.408992 | 1.985844 | 1.993 | 0.5319 |

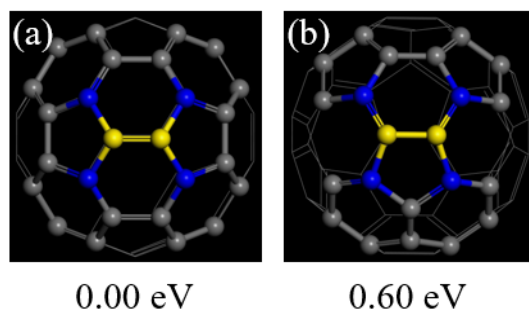

**Fig. S1** Construction of the structures and relative energies for  $C_{54}N_4$  computed in the PBE level of theory.

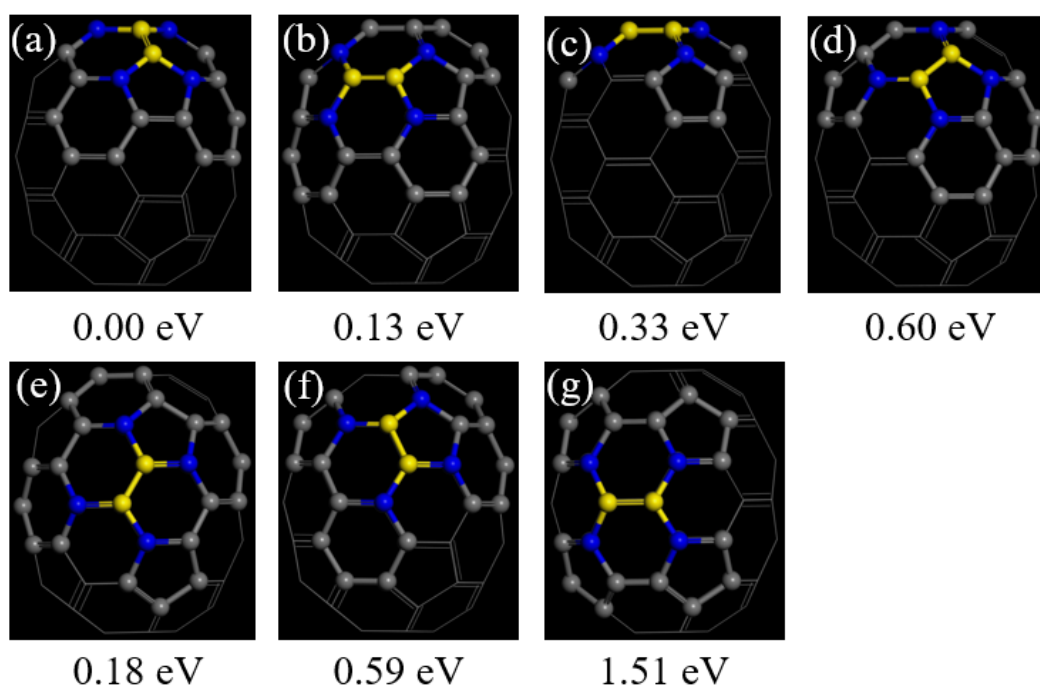

**Fig. S2** Construction of the structures and relative energies for  $C_{64}N_4$  computed in the PBE level of theory.

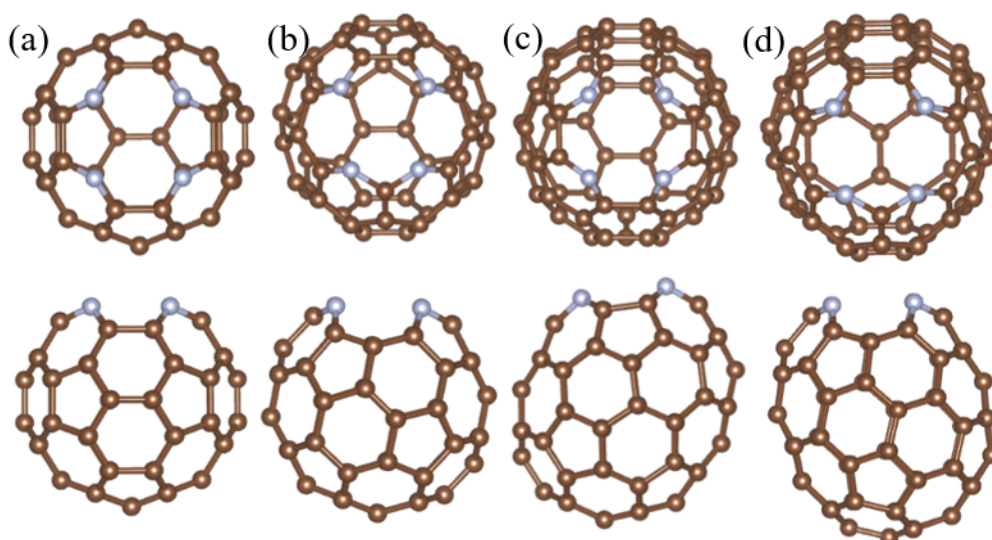

**Fig. S3** Top view and side view of (a)  $C_{54}N_4$ -pyrid with four pyridinic nitrogen, (b)  $C_{54}N_4$ -pyrid-pyrro with two pyridinic nitrogen and two pyrrolic nitrogen, (c)  $C_{64}N_4$ -pyrid with four pyridinic nitrogen, (d)  $C_{64}N_4$ -pyrid-pyrro with two pyridinic nitrogen and two pyrrolic nitrogen.

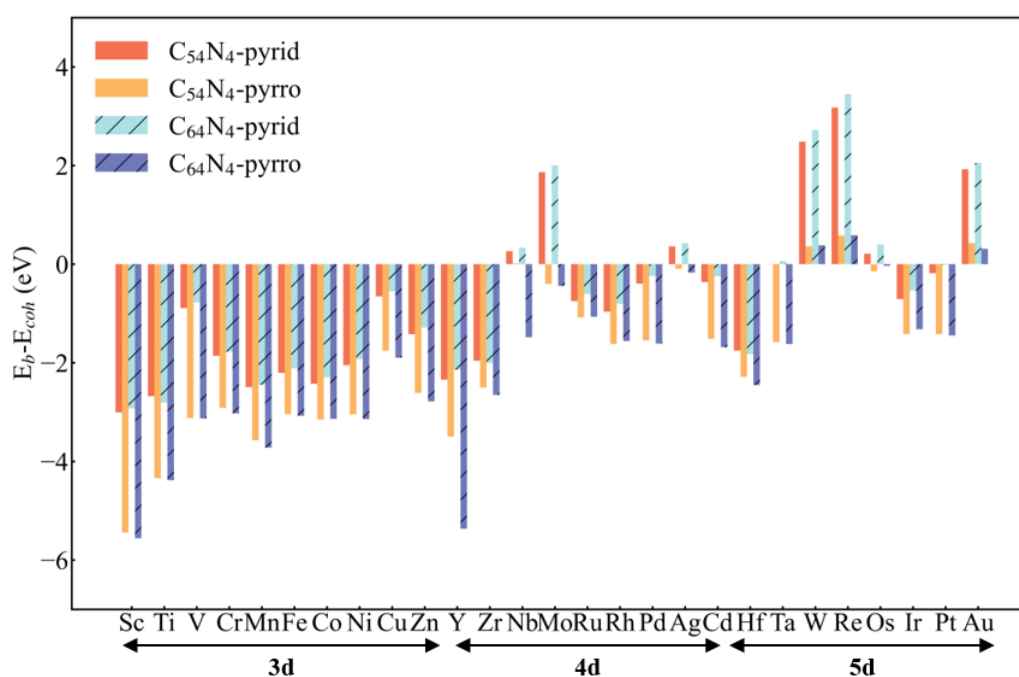

**Fig. S4** The difference between the binding energies of the TM atoms supported on the four azafullerenes  $C_{54}N_4$ -pyrid (light red bars),  $C_{54}N_4$ -pyrid-pyrro (orange bars),  $C_{64}N_4$ -pyrid (light blue bars with diagonal stripes) and  $C_{64}N_4$ -pyrid-pyrro (dark blue bars with diagonal stripes), and the corresponding cohesive energies.



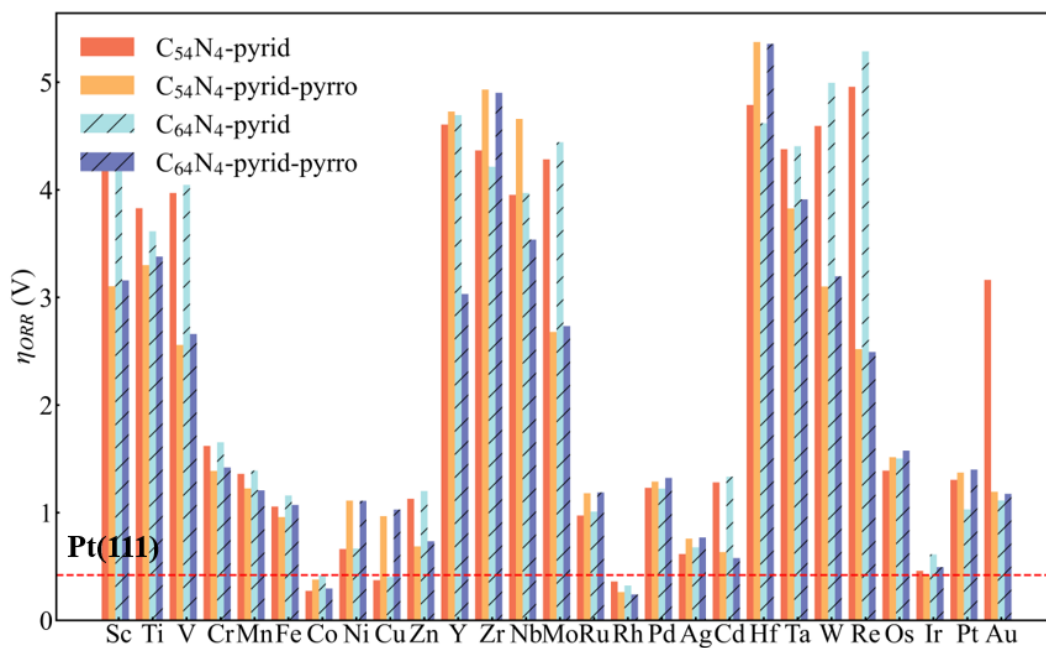

**Fig. S5** Summary of the ORR overpotential for TM supported on the four azafullerenes  $C_{54}N_4$ -pyrid (light red bars),  $C_{54}N_4$ -pyrid-pyrro (orange bars),  $C_{64}N_4$ -pyrid (light blue bars with diagonal stripes) and  $C_{64}N_4$ -pyrid-pyrro (dark blue bars with diagonal stripes).

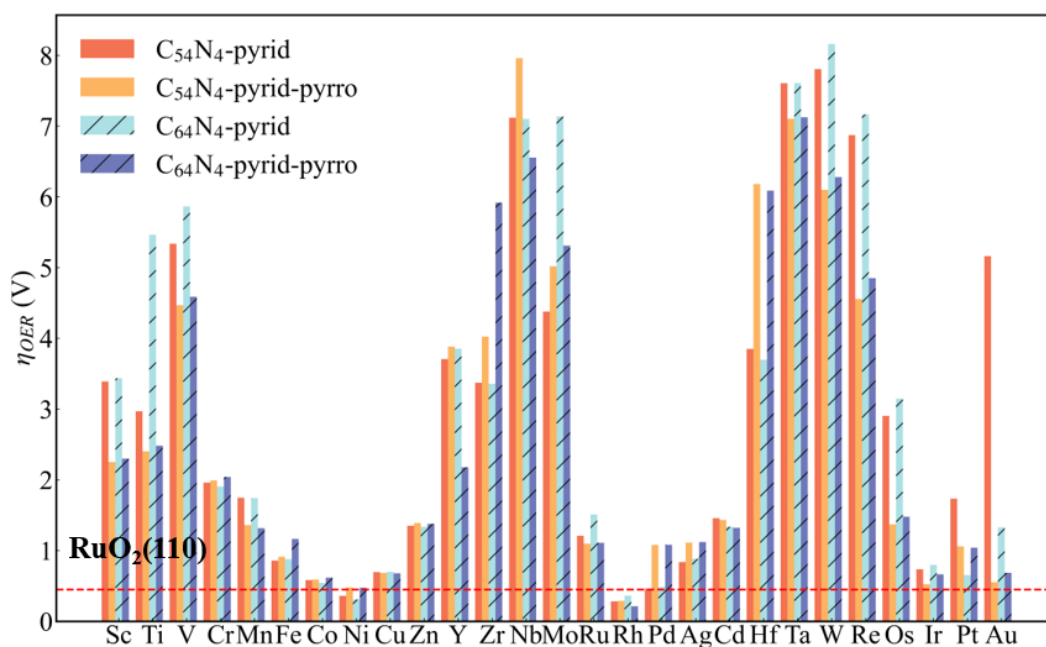

**Fig. S6** Summary of the OER overpotential for TM supported on the four azafullerenes  $C_{54}N_4$ -pyrid (light red bars),  $C_{54}N_4$ -pyrid-pyrro (orange bars),  $C_{64}N_4$ -pyrid (light blue bars with diagonal stripes) and  $C_{64}N_4$ -pyrid-pyrro (dark blue bars with diagonal stripes).

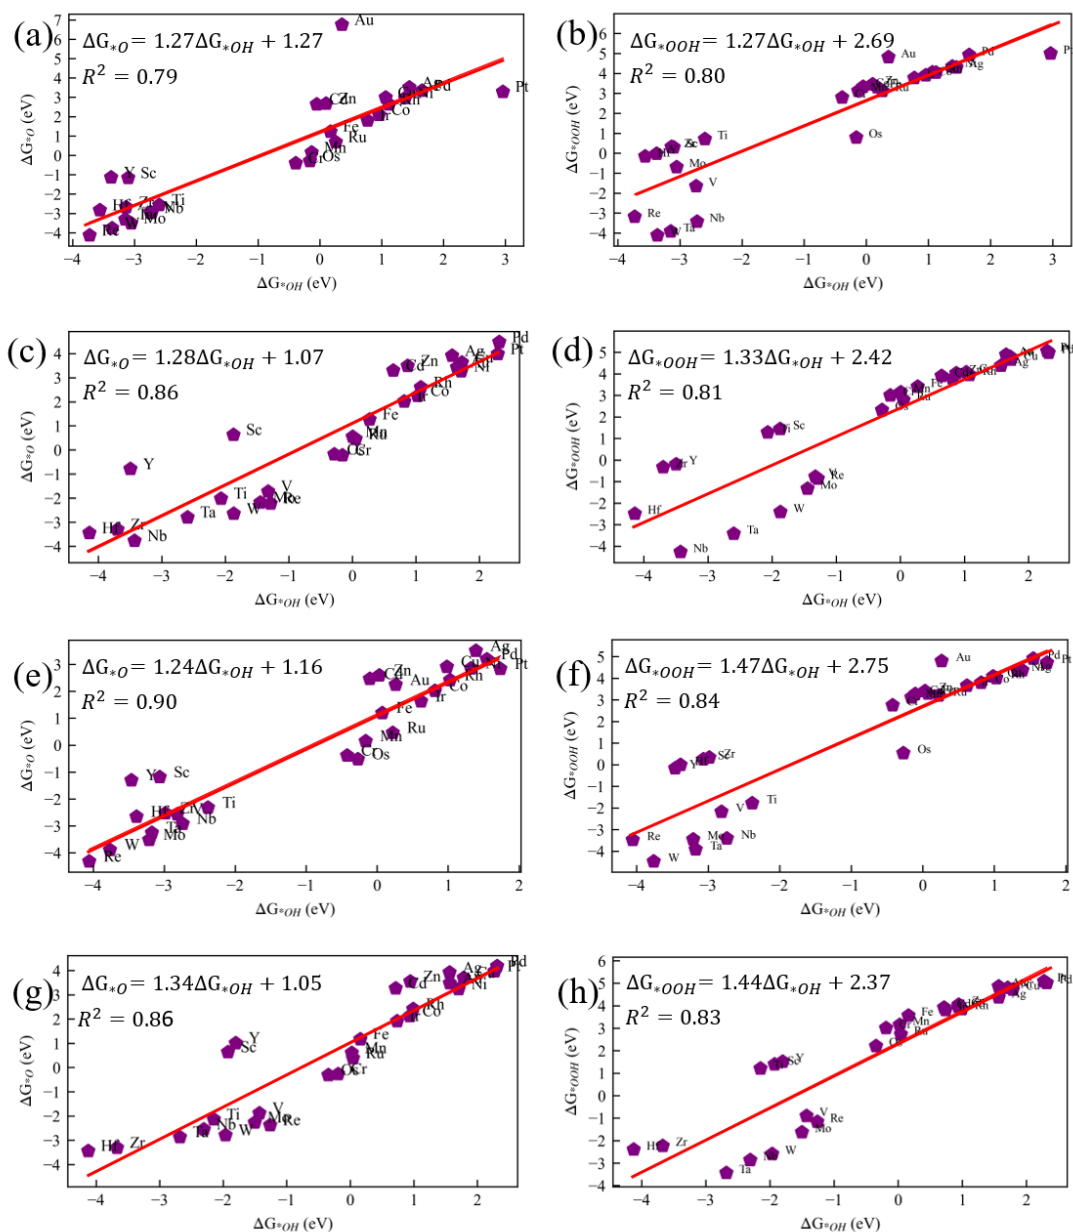

**Fig. S7** Scaling relationship between  $\Delta G_{*O}$  and  $\Delta G_{*OH}$  for (a) TM@C<sub>54</sub>N<sub>4</sub>-pyrid, (c) TM@C<sub>54</sub>N<sub>4</sub>-pyrid-pyrro, (e) TM@C<sub>64</sub>N<sub>4</sub>-pyrid and (g) TM@C<sub>64</sub>N<sub>4</sub>-pyrid-pyrro. And the scaling relationship between  $\Delta G_{*OOH}$  and  $\Delta G_{*OH}$  for (b) TM@C<sub>54</sub>N<sub>4</sub>-pyrid, (d) TM@C<sub>54</sub>N<sub>4</sub>-pyrid-pyrro, (f) TM@C<sub>64</sub>N<sub>4</sub>-pyrid and (h) TM@C<sub>64</sub>N<sub>4</sub>-pyrid-pyrro.

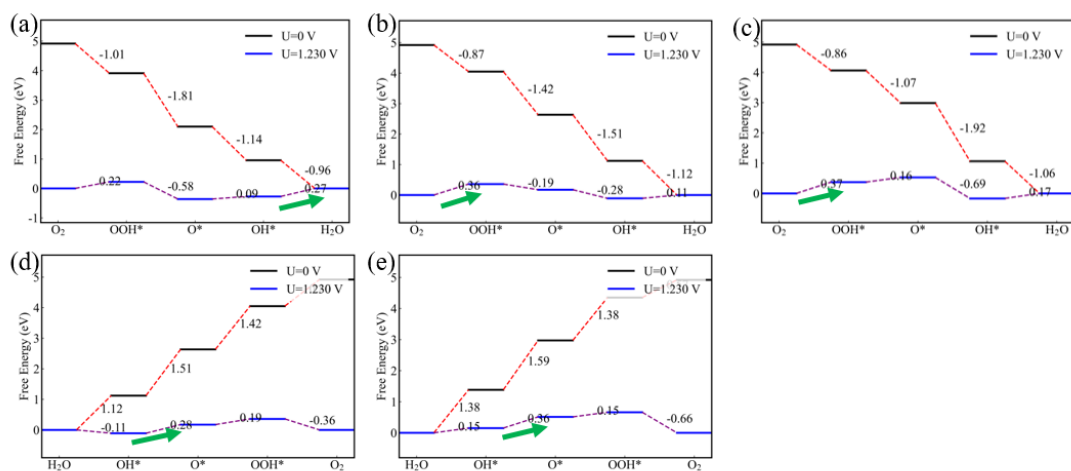

**Fig. S8** Adsorption free energies on (a) Co@C<sub>54</sub>N<sub>4</sub>-pyrid, (b) Rh@C<sub>54</sub>N<sub>4</sub>-pyrid, and (c) Cu@C<sub>54</sub>N<sub>4</sub>-pyrid at electrode potentials of 0 and 1.23 V for ORR and on (d) Rh@C<sub>54</sub>N<sub>4</sub>-pyrid and (e) Ni@C<sub>54</sub>N<sub>4</sub>-pyrid at 0 and 1.23 V for OER.

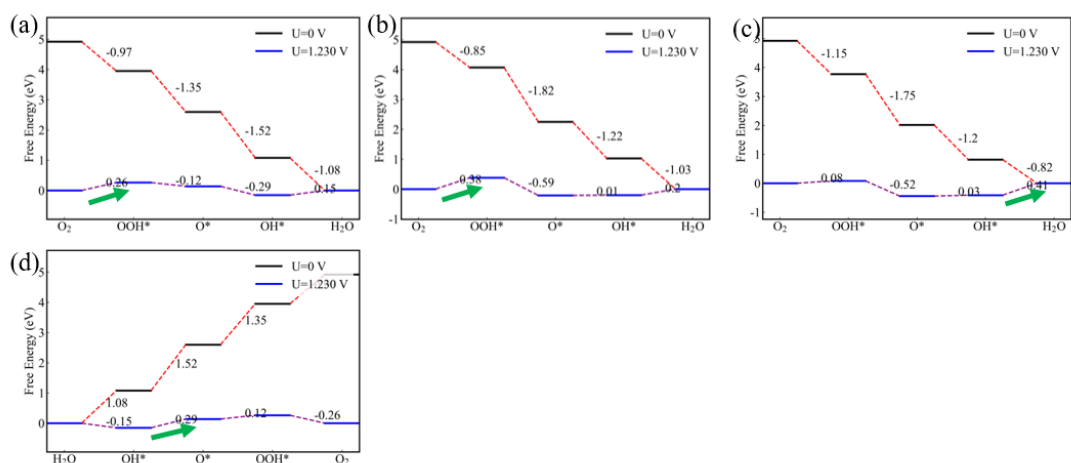

**Fig. S9** Adsorption free energies on (a) Rh@C<sub>54</sub>N<sub>4</sub>-pyrid-pyrro, (b) Co@C<sub>54</sub>N<sub>4</sub>-pyrid-pyrro, and (c) Ir@C<sub>54</sub>N<sub>4</sub>-pyrid-pyrro at electrode potentials of 0 and 1.23 V for ORR and on (d) Rh@C<sub>54</sub>N<sub>4</sub>-pyrid-pyrro at 0 and 1.23 V for OER.

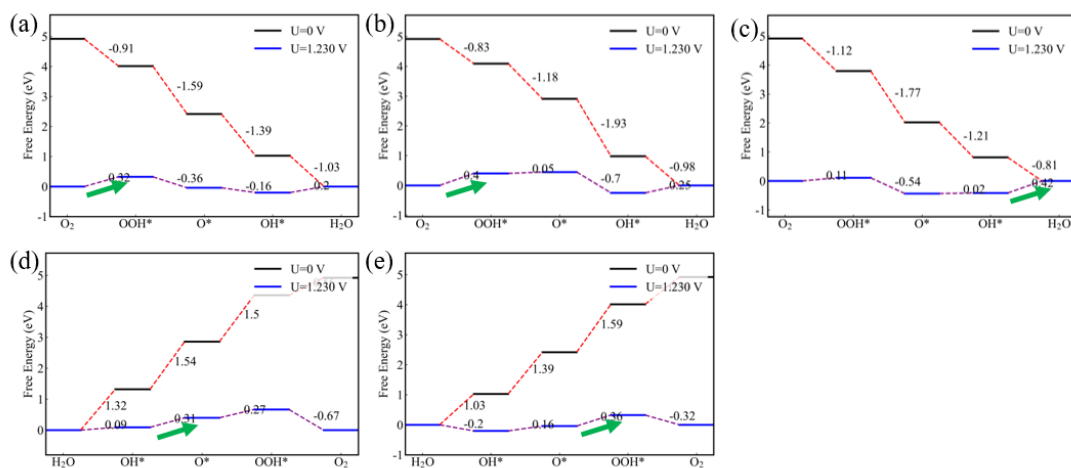

**Fig. S10** Adsorption free energies on (a) Rh@C<sub>64</sub>N<sub>4</sub>-pyrid, (b) Cu@C<sub>64</sub>N<sub>4</sub>-pyrid, and (c) Co@C<sub>64</sub>N<sub>4</sub>-pyrid at electrode potentials of 0 and 1.23 V for ORR and on (d) Ni@C<sub>64</sub>N<sub>4</sub>-pyrid and (e) Rh@C<sub>64</sub>N<sub>4</sub>-pyrid at 0 and 1.23 V for OER.

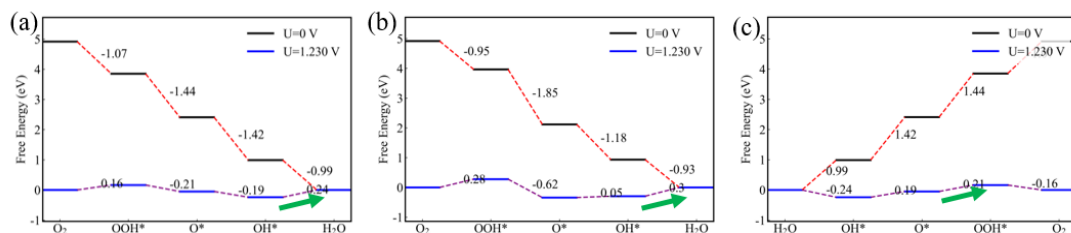

**Fig. S11** Adsorption free energies on (a) Rh@C<sub>64</sub>N<sub>4</sub>-pyrid-pyrro and (b) Co@C<sub>64</sub>N<sub>4</sub>-pyrid-pyrro at electrode potentials of 0 and 1.23 V for ORR and on (c) Rh@C<sub>64</sub>N<sub>4</sub>-pyrid-pyrro at 0 and 1.23 V for OER.

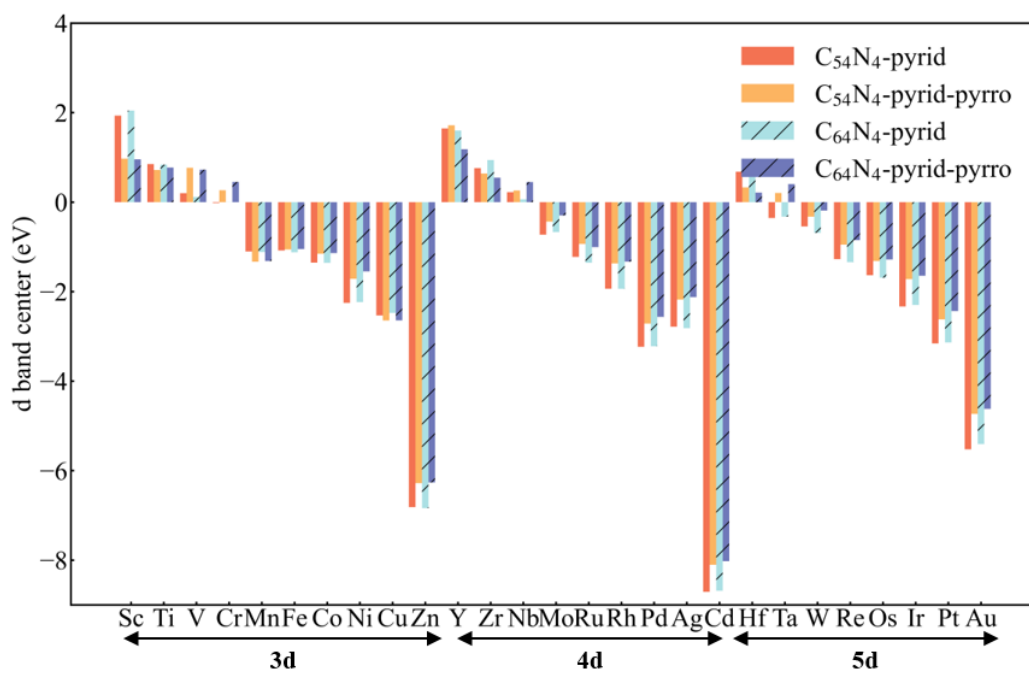

**Fig. S12** *d*-band center energies of the TM atoms on C<sub>54</sub>N<sub>4</sub>-pyrid, C<sub>54</sub>N<sub>4</sub>-pyrid-pyrro, C<sub>64</sub>N<sub>4</sub>-pyrid and C<sub>54</sub>N<sub>4</sub>-pyrid-pyrro.

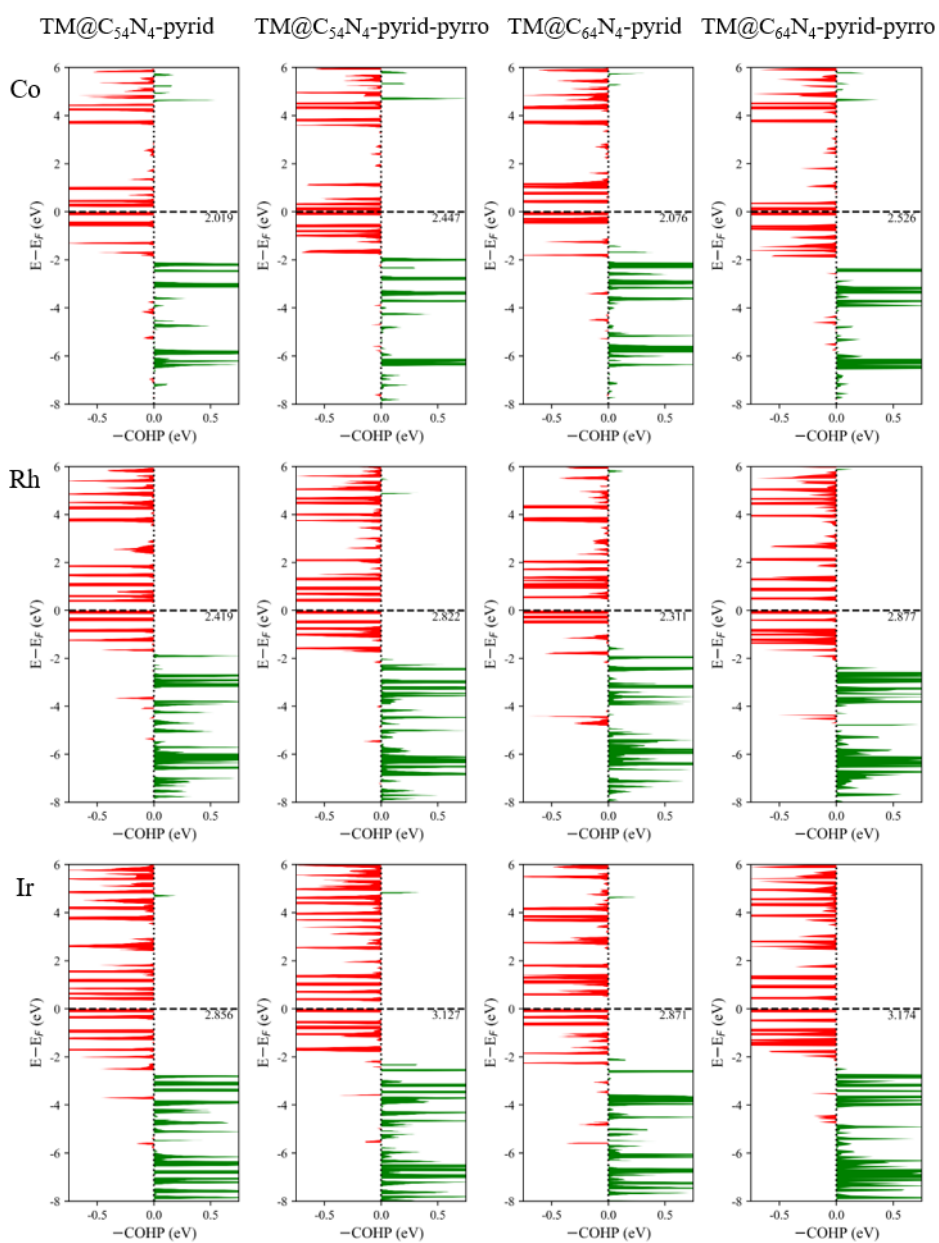

**Fig. S13** Crystal orbital Hamilton population (COHP) between the active centers TM and the OH\* intermediate for TM@C<sub>54</sub>N<sub>4</sub>-pyrid, TM@C<sub>54</sub>N<sub>4</sub>-pyrid-pyrro, TM@C<sub>64</sub>N<sub>4</sub>-pyrid, TM@C<sub>64</sub>N<sub>4</sub>-pyrid-pyrro with the bonding state (green) and antibonding (red) state. (TM = Co, Rh, and Ir).

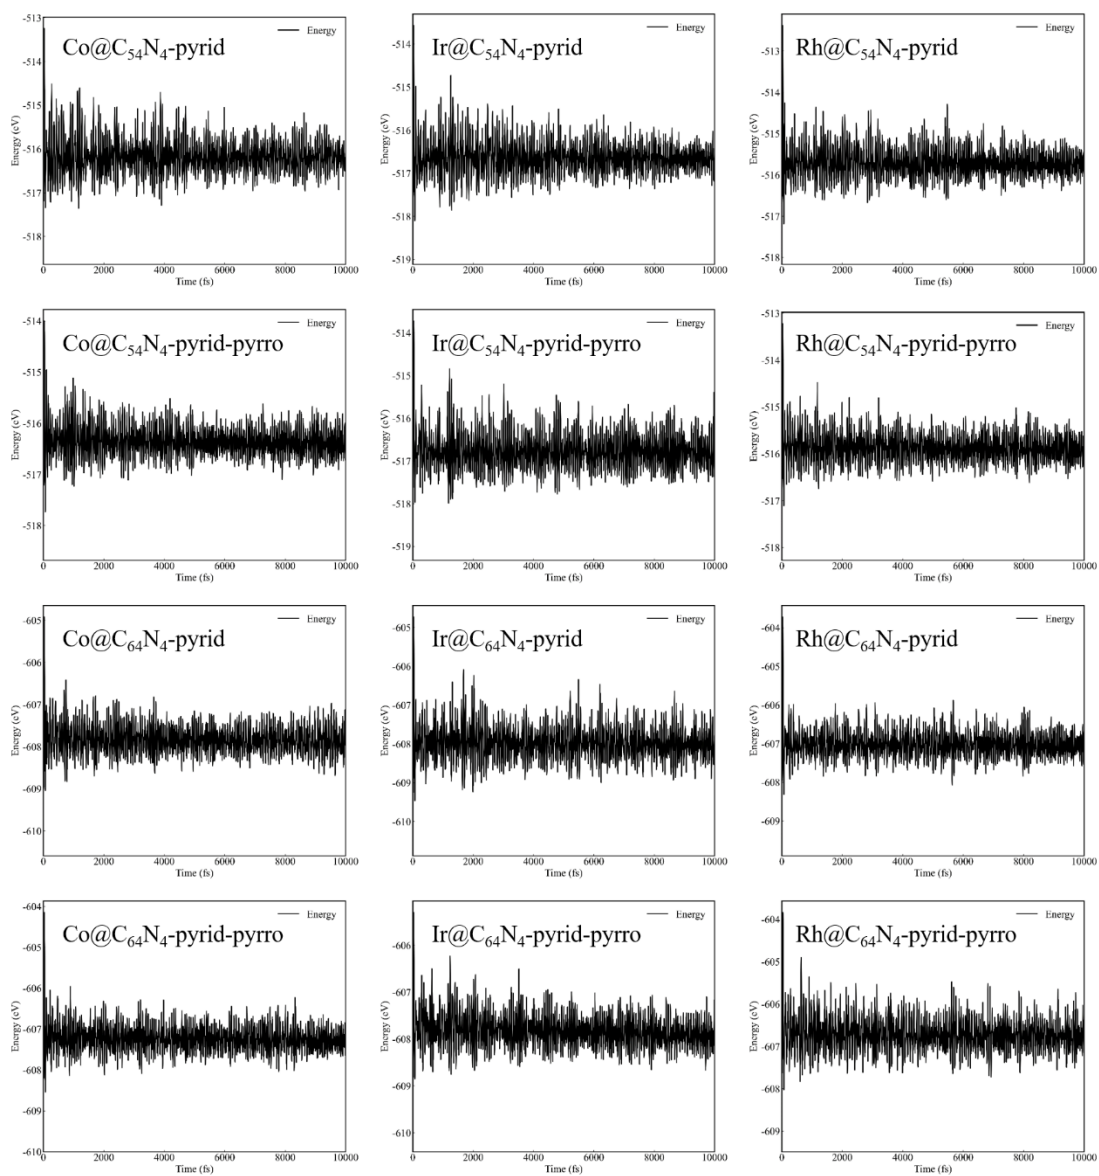

**Fig. S14** Evolution of the temperature and the total energy within 10 ps AIMD simulations at 300 K for  $\text{TM}@C_{54}\text{N}_4\text{-pyrid}$ ,  $\text{TM}@C_{54}\text{N}_4\text{-pyrid-pyrro}$ ,  $\text{TM}@C_{64}\text{N}_4\text{-pyrid}$ , and  $\text{TM}@C_{64}\text{N}_4\text{-pyrid-pyrro}$  (TM = Co, Rh, Ir).

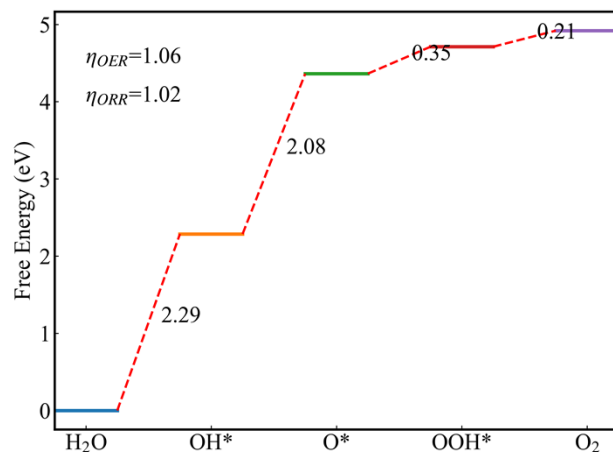

**Fig. S15** Adsorption free energies on PtN<sub>4</sub>@graphene.

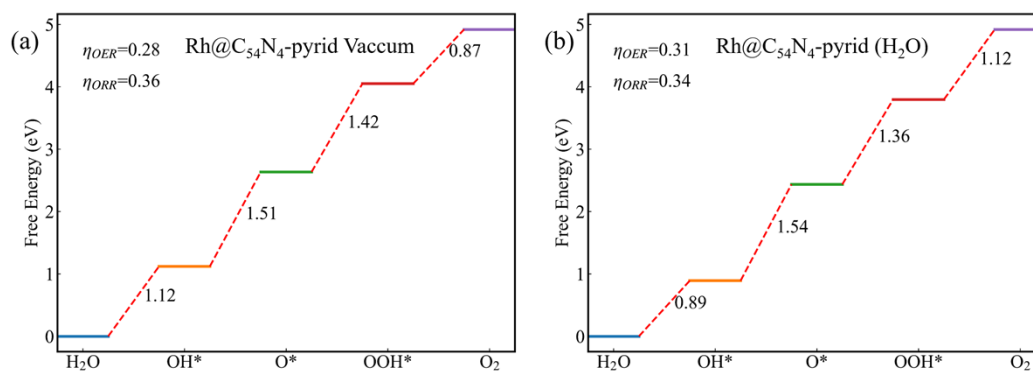

**Fig. S16** A comparison of adsorption free energies on Rh@C<sub>64</sub>N<sub>4</sub>-pyrid from the vacuum and implicit solvent (H<sub>2</sub>O) model.
